# Supplementary material for: Clinical Events with Edoxaban in South Korean and Taiwanese Atrial Fibrillation Patients in Routine Clinical Practice
Source: MDPI journal article supplement (doi:10.3390/jcm10225337), 2021-11-16
Supplement: s1 [file s1]

**Table S1.** One-year clinical events by edoxaban dose

|                     | Total patients<br>(N = 2677) |                       | Korea<br>(n = 1769)  |                      | Taiwan<br>(n = 908)  |                      |
|---------------------|------------------------------|-----------------------|----------------------|----------------------|----------------------|----------------------|
|                     | EDX 30 mg<br>n = 1373        | EDX 60 mg<br>n = 1304 | EDX 30 mg<br>n = 860 | EDX 60 mg<br>n = 909 | EDX 30 mg<br>n = 513 | EDX 60 mg<br>n = 395 |
| Major bleeding      | 17 (1.31)                    | 3 (0.24)              | 6 (0.73)             | 2 (0.23)             | 11 (2.31)            | 1 (0.26)             |
| ICH                 | 7 (0.53)                     | 0                     | 3 (0.36)             | 0                    | 4 (0.83)             | 0                    |
| Major GI bleeding   | 6 (0.46)                     | 0                     | 2 (0.24)             | 0                    | 4 (0.83)             | 0                    |
| CRNM bleeding       | 6 (0.46)                     | 6 (0.48)              | 2 (0.24)             | 1 (0.11)             | 4 (0.84)             | 5 (1.33)             |
| Ischemic stroke     | 12 (0.92)                    | 11 (0.88)             | 4 (0.48)             | 8 (0.92)             | 8 (1.67)             | 3 (0.80)             |
| TIA                 | 4 (0.31)                     | 1 (0.08)              | 1 (0.12)             | 0                    | 3 (0.63)             | 1 (0.26)             |
| Hemorrhagic stroke  | 5 (0.38)                     | 0                     | 3 (0.36)             | 0                    | 2 (0.42)             | 0                    |
| MI                  | 3 (0.23)                     | 1 (0.08)              | 2 (0.24)             | 0                    | 1 (0.21)             | 1 (0.26)             |
| SEE                 | 0                            | 1 (0.08)              | 0                    | 1 (0.11)             | 0                    | 0                    |
| All-cause mortality | 24 (1.83)                    | 6 (0.48)              | 9 (1.08)             | 4 (0.46)             | 15 (3.11)            | 2 (0.53)             |
| CV mortality        | 10 (0.76)                    | 3 (0.24)              | 5 (0.60)             | 3 (0.34)             | 5 (1.04)             | 0                    |

All data presented as *n* (%/year). CRNM, clinically relevant non-major; CV, cardiovascular; EDX, edoxaban; GI, gastrointestinal; ICH, intracranial hemorrhage; MI, myocardial infarction; SEE, systemic embolic event; TIA, transient ischemic attack.

**Table S2.** One-year clinical events by label-recommended edoxaban dose

|                     | Total patients<br>N = 2677            |                                        |                                        |                                        |
|---------------------|---------------------------------------|----------------------------------------|----------------------------------------|----------------------------------------|
|                     | On-label EDX 30 mg<br>n = 863 (32.2%) | Off-label EDX 30 mg<br>n = 510 (19.1%) | On-label EDX 60 mg<br>n = 1033 (38.6%) | Off-label EDX 60 mg<br>n = 271 (10.1%) |
| Major bleeding      | 13 (1.60)                             | 4 (0.82)                               | 3 (0.30)                               | 0                                      |
| ICH                 | 6 (0.74)                              | 1 (0.20)                               | 0                                      | 0                                      |
| Major GI bleeding   | 5 (0.61)                              | 1 (0.20)                               | 0                                      | 0                                      |
| CRNM bleeding       | 5 (0.61)                              | 1 (0.20)                               | 5 (0.50)                               | 1 (0.38)                               |
| Ischemic stroke     | 8 (0.98)                              | 4 (0.81)                               | 9 (0.91)                               | 2 (0.77)                               |
| TIA                 | 4 (0.49)                              | 0                                      | 0                                      | 1 (0.39)                               |
| Hemorrhagic stroke  | 4 (0.49)                              | 1 (0.20)                               | 0                                      | 0                                      |
| MI                  | 1 (0.12)                              | 2 (0.41)                               | 0                                      | 1 (0.39)                               |
| SEE                 | 0                                     | 0                                      | 1 (0.10)                               | 0                                      |
| All-cause mortality | 20 (2.44)                             | 4 (0.81)                               | 4 (0.40)                               | 2 (0.77)                               |
| CV mortality        | 8 (0.98)                              | 2 (0.41)                               | 3 (0.30)                               | 0                                      |

All data presented as *n* (%/year). Off-label refers to patients receiving the 30-mg dose without meeting dose reduction criteria or patients who do not meet dose reduction criteria receiving the standard 60-mg dose. These groups were referred to as “recommended” and “non-recommended” dosing in a previously published report [26].

CRNM, clinically relevant non-major; CV, cardiovascular; EDX, edoxaban; GI, gastrointestinal; ICH, intracranial hemorrhage; MI, myocardial infarction; SEE, systemic embolic event; TIA, transient ischemic attack.
